# Supplementary material
Source: MDPI journal article supplement (https://www.mdpi.com/2311-5637/8/2/41)
Supplement: s1 [file s1]

## Supporting Material

---

### **Remedial Action of Yoghurt Enriched with Watermelon Seed Milk on Renal Injured Hyperuricemic Rats**

Magdy Ramadan Shahein <sup>1</sup>, El Sayed Hassan Atwaa<sup>2</sup>, Khaled Magawry El-Zahar <sup>3</sup>, Ahdab Abdo Elmaadawy <sup>4</sup>, Hayfa Hussin Ali Hijazy <sup>5</sup>, Mahmoud Zaky Sitohy <sup>6</sup>, Ashraf Albrakati <sup>7</sup> and Ehab Kotb Elmahallawy <sup>\*8</sup>

---

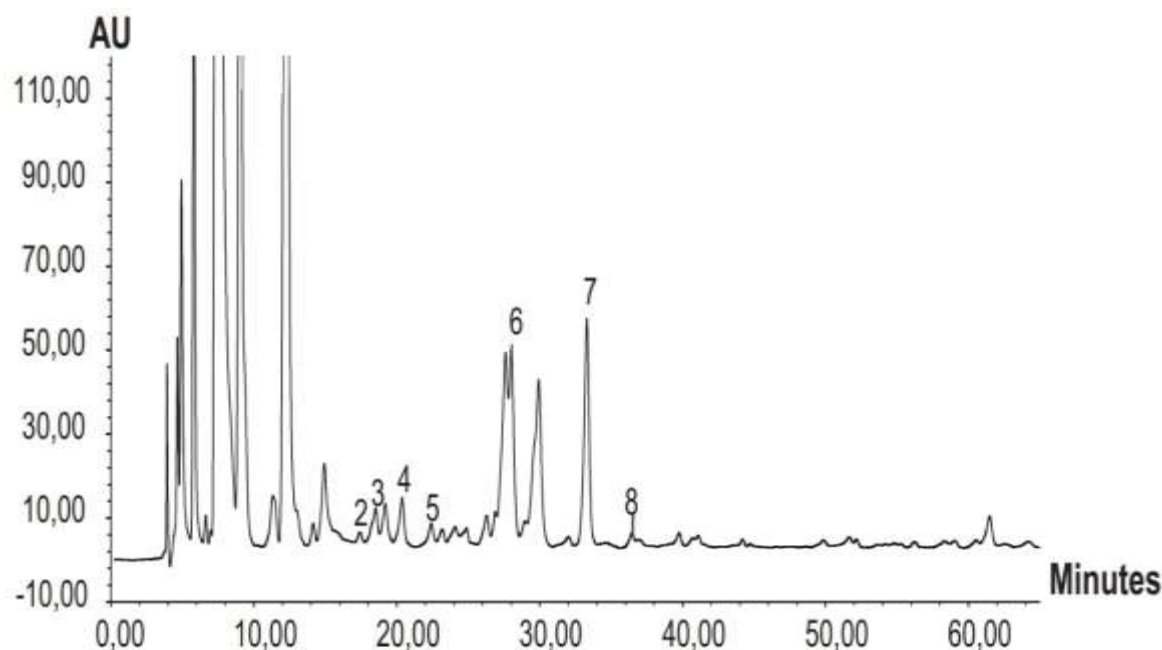

**Figure S1.** The chromatogram of phenolics watermelon seeds extract. Peak numbers: (2) gallic acid; (3) vanillic acid; (4) p-coumaric acid; (5) caffeic acid; (6) 4-hydroxy benzoic; (7) sinapic acid; (8) Syringic acid.
